1 **Flower visitation of alien plants is non-linearly related to phylogenetic and floral similarity to native**  
2 **plants**

3 Mialy Razanajatovo<sup>1\*</sup>, Felana Rakoto Joseph<sup>1</sup>, Princy Rajaonarivelo Andrianina<sup>1</sup>, Mark van  
4 Kleunen<sup>1,2</sup>

5 <sup>1</sup>*Ecology, Department of Biology, University of Konstanz, Universitätsstrasse 10, 78457*  
6 *Konstanz, Germany*

7 <sup>2</sup>*Zhejiang Provincial Key Laboratory of Plant Evolutionary Ecology and Conservation, Taizhou*  
8 *University, Taizhou 318000, China.*

9 **\*E-mail address** [mialy.razanajatovo@uni-hohenheim.de](mailto:mialy.razanajatovo@uni-hohenheim.de)

10 **\*Mailing address (present address)** Institute of Landscape and Plant Ecology (320a),  
11 University of Hohenheim, Ottilie-Zeller-Weg 2, 70599 Stuttgart, Germany

12 **Acknowledgements**

13 We thank Otmar Ficht and Maximilian Fuchs for taking care of the plants in the botanical garden;  
14 Gregor Schmitz for helpful discussions during the planning of the experiment; Lothar Damaschek  
15 for facilitating our use of the grasslands around the University of Konstanz; Anna Brumer, Joëlle  
16 Clot, Linda Richter and Vanessa Schiwietz for their assistance in the field work; Julia Gutbrod,  
17 Hannah Lechner, Elena Werner and V. Schiwietz for their help in analyzing the videos; Ekaterina  
18 Mamonova-Stift for her help in measuring floral reflectance. MR was supported by the German  
19 Research Foundation DFG (RA 3009/1-1) and an Independent Research Grant from the  
20 Zukunftskolleg of the University of Konstanz. FRJ and PRA were supported by the German  
21 Academic Exchange Service DAAD.

22 **Conflict of interest**

23 The authors declare that there is no conflict of interest.

24 **Authors' contributions**

25 MR and MvK designed the study, MR, FRJ and PRA collected the data, MR analyzed the data, MR wrote  
26 the first draft of the manuscript and all authors contributed to revisions.

27 **Data Availability**

28 Should the manuscript be accepted, the data supporting the results will be archived in a public repository,  
29 and the data DOI will be included in the article.

30 **Abstract**

- 31 1. Biological invasions are key to understanding major ecological processes that determine  
32 the formation of novel interactions. Flower visitation to alien species may be facilitated  
33 by co-flowering natives if they share similar floral traits with the latter. However, if  
34 competition for pollinators is important, flower visitation to alien species may be higher if  
35 they have traits different from those of native species. We tested whether flower visitation  
36 to alien plants depended on phylogenetic relatedness and floral similarity to native plants.
- 37 2. In a field experiment, we simulated invaded communities by adding potted alien plants  
38 into co-flowering native communities. We recorded flower visitation to pairs of 34 alien  
39 and 20 native species totalling 151 species combinations for 3,068 hours.
- 40 3. Flower visitation to alien species was highest when they had intermediate floral trait  
41 distances to native species, and either low or high phylogenetic distances. The alien plants  
42 received more similar flower-visitor groups to natives when they had low phylogenetic  
43 and either low or high floral trait distances to native plants.
- 44 4. The non-linear patterns between flower visitation and similarity of the alien and native  
45 species suggest that an interplay of facilitation and competition simultaneously drives the  
46 formation of novel plant-pollinator interactions. The shapes of the relationships of  
47 phylogenetic and floral trait distances with flower visitation to alien plants were  
48 contrasting, possibly due to different strengths of phylogenetic signal among traits.
- 49 5. We provide experimental evidence for the effects of relatedness and functional similarity  
50 to native plants on flower visitation of alien plants. We show that such effects might be  
51 non-linear, and that effects of trait dissimilarity and phylogenetic distance on pollinator-  
52 mediated interactions can reflect different mechanisms.

53 **Keywords** Darwin's Naturalization Hypothesis, environmental filtering, exotic species, floral  
54 traits, invasion ecology, limiting similarity, phylogenetic distance, pollination niche

55

## 56 **Introduction**

57           Biological invasions are a major characteristic of human-induced global environmental  
58 change. Invaded ecosystems and communities in many parts of the world have been affected  
59 severely (Fei et al., 2014; Vilà & Hulme, 2017). For this reason, much of the efforts in ecological  
60 research has aimed at understanding what determines invasiveness. Furthermore, biological  
61 invasions represent natural experiments that offer real-time opportunities to study the assembly of  
62 communities (Shea & Chesson, 2002; Tilman, 2004). Specifically, as many alien organisms have  
63 integrated into native resident communities, biological invasions are key to understanding the  
64 major ecological processes that determine the formation of novel interactions.

65           As related species are likely to be more similar, they should show strong niche overlap  
66 and compete for shared resources. Based on this premise, Darwin (1859) posed that relatedness  
67 between the alien and the native species could impede the success of alien species (Darwin's  
68 Naturalization hypothesis). At the same time, if there are related native species, this indicates that  
69 the environment will most likely be suitable for the alien species too (Preadaptation hypothesis).  
70 These two hypotheses, with opposing predictions on how relatedness between alien and native  
71 species should affect invasion success, are now known as Darwin's Naturalization Conundrum  
72 (Diez et al., 2008). Indeed, the results of previous studies testing these hypotheses are largely  
73 inconsistent, suggesting that the two mechanisms act at different scales and stages of invasion  
74 (Cadotte et al., 2018; Thuiller et al., 2010). Moreover, most of the previous studies were  
75 correlative, based on floristic lists and field observations (Cadotte et al., 2018; Gallien &  
76 Carboni, 2017; Sheppard et al., 2018), whereas manipulative experiments, in which species are  
77 introduced into communities to provide causal insights (e.g. Malecore et al., 2019), are scarce.  
78 Furthermore, most previous studies considered direct interactions between alien and native plant  
79 species (e.g. competition for space or nutrients), but very few studies have tested indirect  
80 interactions such as those mediated by pollinators (but see Bezeng et al., 2015; Burns et al.,  
81 2011). However, as about half of all flowering plant species relies on pollinators for at least 80%  
82 of their seed production (Rodger et al., 2021), the ability to attract resident pollinators can play a  
83 major role in the integration of alien plants in novel communities.

84           To reproduce in the non-native range, alien plants, which are often decoupled from their  
85 historical pollinators can use resident pollinators (Razanajatovo et al., 2015; Razanajatovo & van  
86 Kleunen, 2016; Traveset & Richardson, 2014), and thereby form novel plant-pollinator

87 interactions. There have been two apparently contradicting major concepts on the roles of plant-  
88 pollinator interactions in the assembly of invaded communities (Sargent & Ackerly, 2008). First,  
89 in the case of pollinator facilitation, alien plant species that can use the same pollinators as the  
90 native plant species (because they have more similar floral traits) should more readily attract  
91 pollinators, with similar abundance and composition to native plant species. Second, in the case  
92 of pollinator-mediated competition, alien plant species that can use pollinators different from  
93 those of native plant species should more readily attract pollinators in the local community. In  
94 both cases, the formation of novel plant-pollinator interactions between alien plants and resident  
95 pollinators should depend on the plant traits that influence flower visitation.

96 To advance our understanding of the ecological processes that govern the formation of  
97 novel plant-pollinator interactions, a trait-based approach (Kraft & Ackerly, 2014; McGill et al.,  
98 2006) has been suggested (Aslan et al., 2015). Floral traits, such as flower symmetry, color and  
99 size, can act as signals for flower visitors to locate floral rewards, and have therefore been  
100 considered as important traits that mediate plant-pollinator interactions (Fornoff et al., 2017;  
101 Junker et al., 2015; Ortiz et al., 2021; Reverté et al., 2016). Furthermore, nectar production has  
102 been shown to influence the indirect interactions between co-flowering plants with shared  
103 pollinators (Carvalho et al., 2014). Nevertheless, the floral traits involved in pollinator  
104 attraction are still generally missing from studies in plant-community ecology (E-Vojtkó et al.,  
105 2020; Sargent & Ackerly, 2008). A meta-analysis seeking to understand the impacts of alien  
106 species on the pollination and reproductive success of native species considered floral traits, and  
107 showed that similarities in flower symmetry and color in alien and native plants increased  
108 competition for pollinators (Morales & Traveset, 2009). Therefore, similarity in these floral traits  
109 may play critical roles in pollinator-mediated alien-native plant interactions.

110 The patterns of novel plant-pollinator interactions may differ with regard to phylogenetic  
111 and floral trait distances. While phylogenetic relatedness is frequently assumed to be a proxy for  
112 trait similarity, some floral traits may not be evolutionarily conserved (Sargent & Ackerly, 2008).  
113 For example, closely related species frequently have different flower colors (Eaton et al., 2012;  
114 Shrestha et al., 2014). Alien plant species that are phylogenetically closely related to native  
115 species may have either similar or dissimilar traits to native species. Also, alien species that are  
116 phylogenetically distantly related to native species may have either similar (convergent  
117 evolution) or dissimilar traits to native species. It is therefore important to consider both

118 phylogenetic distance and trait dissimilarity (Cadotte et al., 2013; Lemoine et al., 2015), and to  
119 disentangle the effects of both (Marx et al., 2016). Thus, the patterns of novel plant-pollinator  
120 interactions might be more complex than those predicted by Darwin's Naturalization Conundrum  
121 (Diez et al., 2008). Furthermore, different mechanisms may act simultaneously to drive the  
122 success of alien species, as has been shown for direct plant-plant interactions (Malecore et al.,  
123 2019; Sheppard et al., 2018). When both pollinator facilitation and competition for pollinators  
124 play a role, flower visitation to alien species should be highest or lowest at intermediate  
125 phylogenetic and floral trait distances to native species. It is therefore important to consider  
126 nonlinear relationships between flower visitation to alien species and phylogenetic and floral trait  
127 distances to native species.

128         In a field experiment in which we simulated invaded communities by adding potted alien  
129 plants into co-flowering native communities, we tested whether flower visitation to alien plants  
130 depended on phylogenetic relatedness and functional similarity to native plants. For pollinator  
131 facilitation and competition for flower visitors, respectively, we predicted a negative and a  
132 positive relationship between flower visitation to alien species and phylogenetic or floral trait  
133 distance to natives. If both mechanisms were operating, we predicted non-linear relationships  
134 with either high or low flower visitation at intermediate phylogenetic or floral trait distances (i.e.  
135 hump- or U-shaped relationships). Most previous studies on pollinator-mediated alien-native  
136 plant interactions investigated the impacts of co-flowering alien plants on the pollination and  
137 reproductive success of native species. Our study, in contrast, assessed the outcomes of pollinator  
138 facilitation by and competition for flower visitors with native species on alien species to  
139 understand how alien plants attract pollinators in the invaded range. More specifically, we asked  
140 (1) whether flower visitation to alien plants was related to the phylogenetic and floral trait  
141 distances between the alien and native species, and (2) whether the similarity in flower visitor  
142 composition was related to the phylogenetic and floral trait distances between the alien and native  
143 species.

## 144 **Materials and Methods**

### 145 *Study species and sites*

146         To simulate invaded communities in a field experiment in central Europe, we selected 34  
147 herbaceous insect-pollinated neophytes (i.e. alien species introduced after the discovery of the

148 Americas in 1492), covering a broad variation in floral traits such as size, symmetry and colors,  
149 occurring in semi-natural grasslands and anthropogenic or ruderal habitats, and usually flowering  
150 between April and September. The alien species belonged to 14 plant families, 68% were short-  
151 lived (annual or biennial), and 24% were self-incompatible (Supporting Information Table S1).  
152 The species neophyte status was based on information in the Floraweb  
153 (<http://floraweb.de/index.html>) and the Bioflor (Kühn et al., 2004) databases. We precultivated  
154 the alien plant species from seeds or seedlings (Table S1) in the research garden of the University  
155 of Konstanz in Germany (<http://www.uni-konstanz.de/botanischergarten/>) until they flowered.  
156 From May to September 2018, we carried out the field experiment in managed meadows near the  
157 city of Konstanz (Table S2).

### 158 *Experimental set-up and flower-visitation recording*

159 Two to three days before adding alien plants to flowering resident native communities, we  
160 prospected grasslands around the city of Konstanz, and identified sites that were visibly  
161 dominated by one flowering native species, which served as the host native species. We then  
162 recorded the density of flowers as the number of flower units per 1m<sup>2</sup> for all flowering species  
163 recorded in one 25 m<sup>2</sup> plot at each site. To standardize the number of flower units across different  
164 species, we considered a flower unit to correspond to a receptacle area of 1 cm<sup>2</sup> (Carvalho et  
165 al., 2014). We selected a total of 25 sites where the density of flowers for the host native species  
166 and for all flowering species ranged from 24 to 4,900 and from 10 to 1,763, respectively (Table  
167 S2). To simulate invaded communities, we placed for up to ten alien species (range=4-10,  
168 median=5) up to five (range= 2-5, median=4) potted flowering individuals into a site. The exact  
169 numbers depended on the availability of flowering alien plants. We paired each added alien plant  
170 individual with a host native plant individual. To let the alien plants adjust to the flower-visitor  
171 communities, and the insects to the newly added plants, we left the alien plants for two to three  
172 days at each site before we recorded flower visitation. We used a total of 20 host native species,  
173 i.e. the dominant flowering native species at a site (Table S2), belonging to ten plant families. In  
174 total, we had 151 combinations of added alien and host native species, spanning phylogenetic  
175 distances between the alien and the native species from 10.64 to 295.60 (median=236.40) million  
176 years (for the calculation of phylogenetic distance, see below).

177 To record flower visitation, we placed a BRINNO TLC200 time-lapse camera  
178 (<https://www.brinno.com/time-lapse-camera/TLC200>) at a vertical distance of 25-30 cm above

179 the flowers of the paired flowering alien and native plants (Fig. S1). We set the time-lapse  
180 interval at 2 seconds and recorded from 10:30 to 16:30 on a sunny day (except for two set-ups in  
181 which we recorded from 9:30 to 14:30 due to logistic constraints). Sampling was done on one day  
182 for each setup. By using 40 cameras, we could observe many pairs of plants simultaneously. The  
183 alien plants were removed from the experimental plots at the end of the recording day. We  
184 collected a total of 3,068 hours of observations, which corresponded to 3 terabytes of video files.  
185 We analyzed each video file manually using the Blender software (<https://www.blender.org/>).  
186 The video analysis consisted of counting flower visits to the alien and the native plants in each  
187 species pair. We considered a flower visit when the flower visitor made contact with reproductive  
188 organs (anther and stigma). We attributed each flower visitor to one of the following flower  
189 visitor groups: Hymenoptera: honeybees (*Apis* spp.), bumblebees (*Bombus* spp.), other bees and  
190 wasps; Coleoptera (beetles); Diptera: hoverflies/syrphids and other flies; Lepidoptera: butterflies  
191 and moths; Mecoptera; Neuroptera; other unknown groups (impossible to identify). We recorded  
192 flower visitation for each one-hour interval within the whole recording time. We also counted the  
193 number of observed alien and native flower units within each frame.

#### 194 ***Measurements of floral traits***

195 Using five plants per added alien and host native species at each site, we measured floral  
196 traits that most likely influence flower-visitor attraction. We recorded flower symmetry (radial or  
197 bilateral), and measured flower size as the diameter or the largest width of a flower. To measure  
198 flower color, we measured floral reflectance spectra using an AvaSpec-2048 fibre optic  
199 spectrometer and an Ava Light-XE xenon light source (Avantes, Eerbeek, The Netherlands)  
200 relative to a standard white reference tile (WS-2) at an angle of 90°. We measured the reflectance  
201 spectra of five corolla samples (each from different plants) per added alien and host native  
202 species. We classified the spectra into four binomial categories: blue (wavelength 401-470 nm),  
203 green (471-540 nm), yellow (541-610 nm) and red (611-680 nm), based on the presence/absence  
204 of local maxima at the respective wavelength interval (Fornoff et al., 2017). As a measure of the  
205 presence of floral rewards, we added data on nectar production (yes/no) using database and  
206 literature sources (Table S3).

#### 207 ***Calculation of phylogenetic and floral trait distances***

208 To test whether flower visitation to the alien species was influenced by relatedness and  
209 floral similarity between the alien and the native species, we calculated phylogenetic and floral



210 trait distances. We constructed a phylogenetic tree for the alien and native species by pruning the  
211 dated DaPhnE supertree (Durka & Michalski, 2012). Because *Hypochoeris radiata* was not  
212 included in the DaPhnE tree, we added a tip at the root of the Hypochoeris genus using the  
213 `add.species.to.genus` function of the `phytools` package (Revell, 2012) in R version R-4.0.4 (R-  
214 Core-Team, 2021). For each pair of added alien and host native species, we calculated the  
215 phylogenetic distance using the `cophenetic` function of the `ape` package (Paradis & Schliep, 2019)  
216 in R. To calculate an overall floral trait distance between each pair of alien and native species, we  
217 calculated the Gower dissimilarity (Gower, 1971) based on continuous (flower size) and  
218 categorical (flower symmetry, binary floral reflectance components and nectar production) floral  
219 traits, using the `gowdis` function of the `FD` package (Laliberté et al., 2014; Laliberté & Legendre,  
220 2010) in R. We also calculated single floral trait distances and dissimilarities between the alien  
221 and the native species: flower-size distance, flower-symmetry dissimilarity, dissimilarity in each  
222 of the four floral reflectance components, and nectar-production-dissimilarity. We calculated  
223 absolute and hierarchical floral trait distances (Ferenc & Sheppard, 2020; Kunstler et al., 2012).  
224 To assess the association between phylogenetic and floral trait distances, we estimated the  
225 strength of the phylogenetic signal, using Pagel's lambda with the `phylosig` function of the  
226 `phytools` package for the continuous trait, and the phylogenetic D statistic with the `phylo.d`  
227 function of the `caper` package (Orme et al., 2012) for the categorical traits.

## 228 *Statistical analyses*

229 To test whether flower visitation to alien plant species depended on the phylogenetic and  
230 floral trait distances between the alien and the native species, we analyzed the total number of  
231 flower visits to the added alien plants, the proportion of flower visits to the alien plant relative to  
232 the sum of flower visits to both alien and host native plants, and the similarity between the flower  
233 visitor compositions of the alien and the native plants.

234 We analyzed the total number of flower visits to the alien plants with negative binomial  
235 generalized linear mixed models using the `glmer.nb` function in the `lme4` package (Bates et al.,  
236 2014) in R. To account for potential variation due to floral characteristics of the observed plants,  
237 we included the number of observed flower units of the native plant, the number of observed  
238 flower units of the alien plant, the flower size, the flower symmetry (radial=0, bilateral=1), the  
239 floral reflectance binary categories Wavelength 401-470 nm, Wavelength 471-540 nm,  
240 Wavelength 541-610 nm and Wavelength 611-680 nm of the alien plants, and the nectar



241 production (absent=0, present=1). To account for potential variation of flower-visitor activity  
242 during the day, we additionally included the time interval during the day (one-hour intervals as a  
243 discrete variable) as an explanatory variable. To test for the effects of either the phylogenetic or  
244 the floral trait distance between the alien and the native species, we also included them as  
245 explanatory variables. All covariates were centered to means of zero and scaled to standard  
246 deviations of one. To test for potential nonlinear effects, we included the quadratic terms for the  
247 time interval during the day and phylogenetic or floral trait distance. As the latter were centered  
248 and scaled, the non-linear effects test for hump- and U-shaped relationships. We also ran the  
249 models with linear terms only, and we present the results of the model with the lowest AIC. To  
250 account for non-independence of observations within species, we included identities of the added  
251 alien species and the host native species as random factors. Models including site as an additional  
252 random factor to account for potential variation due to site characteristics, such as floral  
253 abundance, did not converge, as native species and site were largely confounded (Table S1).  
254 Similarly, models including date of observation as a random factor to account for potential  
255 variation due to change in flower visitor communities along the growing season did not converge.  
256 To understand whether the resulting patterns were driven by a particular flower visitor group, we  
257 also built similar models in which we used as response variables the number of flower visits to  
258 the alien plants by Hymenoptera only and by Diptera only, representing the insect orders that  
259 contributed most visits (77.24 % and 10.57 %, respectively). We also built models in which we  
260 considered each floral trait distance between the alien and the native species separately, instead of  
261 an overall floral trait distance. We considered absolute and hierarchical floral trait distances.  
262 Additionally, we built models in which we included both phylogenetic and floral trait distances,  
263 instead of separately.

264 To account for the number of flower visits to native plants, we analyzed the logit  
265 transformed proportion of flower visits to the alien plant relative to the sum of flower visits to  
266 both alien and host native plants (Warton & Hui, 2011) in linear mixed models using the lmer  
267 function of the lme4 package in R. We included the same explanatory variables and random  
268 factors as in the above models, except for the number of observed flower units of the alien and  
269 the native plants, which we replaced with the logit transformed ratio of the number of flower  
270 units of the alien plant divided by the sum of the numbers of flower units of the alien and native  
271 plants.

272 To analyze the similarity of the flower-visitor compositions between the alien and the  
273 native plants, we calculated a Bray-Curtis similarity index (one minus Bray-Curtis dissimilarity  
274 index) based on the abundance of each flower-visitor group (excluding the unknown groups). We  
275 analyzed the logit transformed Bray-Curtis similarity index in linear mixed models using the lmer  
276 function of the lme4 package in R. We included the same explanatory variables and random  
277 factors as in the above models. From these models, we excluded the 1,051 observations for which  
278 the number of flower visits to the alien or to the native plant was zero, leaving 2,017 observations  
279 with flower visits. For all models, we reported the marginal and conditional  $r^2$  (Nakagawa et al.,  
280 2017).

## 281 **Results**

### 282 *Effects of phylogenetic and floral trait distances on flower visitation*

283 The alien plants received significantly more flower visits in the middle of the day around  
284 12:00 (Fig. S2) and the number was higher when more of their flower units were observed  
285 (Tables 1 and 2). Moreover, they received more visits when they had larger flowers, when their  
286 floral reflectance had local maxima in the yellow wavelength interval 541-610 nm, and when  
287 they produced nectar (Tables 1 and 2). The alien plants received significantly fewer flower visits  
288 when the number of observed flowers on the paired native plant increased (Tables 1 and 2).  
289 Among the floral traits, flower size and symmetry had strong phylogenetic signals (Table 3). We  
290 found that the phylogenetic distance between the alien and the native plant had significant  
291 nonlinear effects on the total number of flower visits to the alien plant and on the proportion of  
292 flower visits to the alien relative to the total number of visits to alien and native plants (Fig. 1a  
293 and 1c, Table 1). Flower visitation to aliens was lowest when they had intermediate phylogenetic  
294 distances to natives (Fig. 1a and 1c). The floral trait distance between the alien and the native  
295 plant also had significant nonlinear effects on the total number of flower visits to the alien plant  
296 and on the proportion of flower visits to the alien relative to the total number of visits to alien and  
297 native plants (Fig. 1b and 1d, Table 2). The alien plants with intermediate floral trait distances to  
298 native plants received the most flower visits (Fig. 1b and 1d). We found qualitatively similar  
299 results in the analysis of flower visitation by Hymenoptera only (Table S4), but partly different  
300 results in the analysis of flower visitation by Diptera only (Table S5). We also found qualitatively  
301 similar results in the analyses including both phylogenetic and floral trait distances (Table S6).

302           When single absolute floral trait distances were considered separately, we found that alien  
303 plants received significantly more flower visits when flower symmetry, the presence of local  
304 maxima in the green wavelength interval 471-540 nm of the reflectance spectra and nectar  
305 production were dissimilar to the native plants (Table S7). Alien plants received significantly  
306 fewer flower visits when flower size distance was larger and when the presence of local maxima  
307 in the blue wavelength interval 401-470 nm was dissimilar to the native plants (Table S7). When  
308 hierarchical floral trait distances were considered, we found that alien plants received  
309 significantly more flower visits when native plants had local maxima in the blue wavelength  
310 interval 401-470 nm of the flower reflectance spectra and the alien plants not (Table S8). Alien  
311 plants received significantly fewer flower visits when native plants produced nectar and the alien  
312 plants not (Table S8).

313 *Effects of phylogenetic and floral trait distances on similarity in composition of flower visitors to*  
314 *alien and native species*

315           The alien plants received significantly more similar flower visitors to those on native  
316 plants when the floral reflectance of the alien plant had local maxima in the yellow wavelength  
317 interval 541-610 nm, and marginally significantly when the alien plant produced nectar (Table 4).  
318 The alien plants received significantly fewer flower visitors that were similar to those on native  
319 plants when the number of observed flowers on the native plants increased (Table 4). We found  
320 that the phylogenetic distance between the alien and the native plant had a significant negative  
321 effect on the similarity between the flower visitor compositions of the alien and the native plants  
322 (Fig. 1e, Table 4). The alien plants with high phylogenetic distances to native plants had the least  
323 similar flower visitor composition to native plants. The floral trait distance between the alien and  
324 the native plant had a significant nonlinear effect on the similarity between the flower visitor  
325 compositions of the alien and the native plants (Fig. 1f, Table 4). The alien plants with  
326 intermediate floral trait distances to native plants had the least similar flower visitor composition  
327 to native plants (Fig. 1f).

## 328 **Discussion**

329           In a field experiment simulating invaded co-flowering communities, we found that flower  
330 visitation to alien species was highest when they had intermediate floral trait distances to native  
331 species, but either low or high phylogenetic distances. This apparent discrepancy may be due to

332 different strengths of phylogenetic signal among traits. The alien plants also received more  
333 similar flower visitor groups to natives when they had low phylogenetic and either low or high  
334 floral trait distances. The non-linear patterns could be the combined result of facilitation for  
335 flower visitation (causing a negative relationship between phylogenetic or floral trait distance and  
336 flower visitation to alien species) and competition for flower visitors (causing a positive  
337 relationship) (Gallien & Carboni, 2017).

### 338 *Non-linear effects of phylogenetic and floral trait distances*

339 Environmental filtering would benefit alien plants that are similar to the native ones, and  
340 pollination could be one of the environmental filters. Novel pollinator-mediated alien-native plant  
341 interactions can be characterized by a positive influence of co-flowering native plants on the  
342 pollination of alien plants (facilitation). Pollinator facilitation operates through different trait-  
343 based-effect mechanisms including mimic and magnet effects (Braun & Lortie, 2019). Dominant  
344 co-flowering native plants can act as mimic or magnet species that attract pollinators to serve the  
345 aliens plants, which have usually left their historical pollinators behind. Pollinator facilitation has  
346 been documented in different invaded and non-invaded flowering communities (Bergamo et al.,  
347 2020; Ha et al., 2021; Molina-Montenegro et al., 2008; Tur et al., 2016). Some previous studies  
348 also provided evidence for pollinator facilitation by alien species to co-flowering natives through  
349 the magnet species effect (Groulx & Sargent, 2018; Masters & Emery, 2015; Montero-Castaño &  
350 Vilà, 2015; Stiers et al., 2014). The non-linear patterns between flower visitation and similarity of  
351 the alien and native species in our study suggest flower visitor facilitation by native species to  
352 alien species, at least partially. Nevertheless, more detailed assessments on its effects on plant  
353 reproduction should be required to understand the exact processes operating.

354 The observed patterns of novel pollinator-mediated alien-native plant interactions can also  
355 be the outcome of a negative influence of co-flowering native plants on the flower visitation to  
356 alien plants (competition). Such competitive interactions are expected to be strongest between  
357 plant species that are very similar. The mechanisms of competition for pollinators are complex,  
358 including effects of the number of visits on quantity and quality of conspecific pollen received  
359 (Mitchell et al., 2009). Alien plants co-occurring and sharing pollinators with one or more  
360 dominant flowering natives can compete for pollinator attention, leading to a reduction in flower  
361 visitation to the aliens. Pollinator facilitation and competition for pollinators can also act

362 simultaneously in pollinator-mediated alien-native plant interactions (e.g. Bergamo et al., 2018).  
363 As we did not quantify visitation to aliens in the absence of natives, we could not quantify  
364 facilitation and competition directly. However, as the strength of facilitative and competitive  
365 interactions is likely to depend on the dissimilarity of the species, the non-linear patterns we  
366 found suggest an interplay of facilitation and competition (Gallien & Carboni, 2017).

367 *A discrepancy between the effects of phylogenetic and floral trait distances*

368 Most studies on Darwin's Naturalization Conundrum use phylogenetic distance because it  
369 should reflect how functionally dissimilar the species are. This is based on the idea that most  
370 traits are phylogenetically conserved. While we found strong phylogenetic signals for flower size  
371 and symmetry, the signals were much weaker for spectral reflectance and nectar production,  
372 suggesting that phylogenetic distance might not entirely capture functional trait distance. Other  
373 studies have also found that flower color is not strongly conserved (Rausher, 2008; Shrestha et  
374 al., 2014). On the other hand, in contrast with our results, (Ornelas et al., 2007) found a strong  
375 phylogenetic signal in nectar volume and sugar production in their study using 289 species.  
376 Remarkably, in our study, while flower visitation was highest at intermediate floral trait distances  
377 it was lowest at intermediate phylogenetic distances. This shows that patterns for phylogenetic  
378 and trait dissimilarity do not need to be consistent, and may reflect different mechanisms.

379 Whether co-flowering alien and native plants interact via pollinator facilitation and  
380 competition for pollinators depends on the degree of pollinator sharing. In an analysis of 29  
381 plant-pollinator networks, (Vamosi et al., 2014) found that pollinators were more likely to visit  
382 closely related species. By analyzing the phylogenetic relatedness among both plants and animals  
383 in 36 plant-pollinator and 23 plant-frugivore networks, (Rezende et al., 2007) found that  
384 phylogenetically closely related species interacted with a similar set of species. In our study, alien  
385 plants with high phylogenetic and intermediate floral trait distances to native plants had the least  
386 similar flower-visitor composition to natives (Fig. 1). This suggests that floral trait distances may  
387 influence pollinator sharing. Also, the higher visitation of alien plants with intermediate floral  
388 trait distances may be largely due to visitation by insects that do not visit the native plants.  
389 Nevertheless, future studies should identify flower visitors to more resolved taxonomic levels to  
390 more accurately assess the relationships of phylogenetic and floral trait distances with pollinator  
391 sharing.

392 In line with previous findings on pollinator-mediated interactions between alien and  
393 native plants (Morales & Traveset, 2009), we found that dissimilarity in floral symmetry was  
394 associated with competition for pollinators, as indicated by a positive relationship between floral  
395 symmetry dissimilarity and flower visitation to alien plants (Table S7). However, our result on  
396 dissimilarity in flower color was partly different from previous studies, as dissimilarity in  
397 different components of floral reflectance was associated with either competition or facilitation.  
398 For example, we found a negative relationship between dissimilarity in the blue wavelength  
399 patterns of petals and flower visitation to alien plants (Table S7). This may be driven by the most  
400 abundant flower visitors in our study, the bees (Hymenoptera), which frequently prefer the blue  
401 wavelengths (Hsu & Yang, 2012; Razanajatovo et al., 2015). Our findings could thus indicate  
402 that similarity in blue wavelength patterns in the petals may increase pollinator facilitation by  
403 bees. While previous studies on pollinator-mediated community assembly processes were based  
404 on patterns of floral trait distributions within communities (de Jager et al., 2011; Fornoff et al.,  
405 2017), by using a manipulative experiment and focusing on pairs of alien and native plants, our  
406 results suggest an important role of floral trait similarity in the formation of novel interactions.

407 In our study, the shapes of the relationships of phylogenetic and floral trait distances with  
408 flower visitation to alien plants were contrasting (Fig. 1). The reason for this apparent  
409 discrepancy could lay in the floral traits considered in the study and that we may not have  
410 measured all relevant traits. If the floral traits are evolutionarily conserved, patterns of trait  
411 similarity can be reflected by phylogenetic relatedness (Sargent & Ackerly, 2008). Out of the  
412 seven traits included in our study, only flower size and symmetry had strong phylogenetic signals  
413 (Table 3). Furthermore, single floral trait distances had different directions of effects, suggesting  
414 facilitative, neutral or competitive effects (Table S7). While for the number of visits to aliens, our  
415 phylogenetic distance model had the best fit (lowest AIC), interestingly, for the proportional  
416 visits and the visitor community similarity, the floral trait distance models had the best fit. Thus,  
417 our findings suggest that both phylogenetic and floral trait distances influence pollinator  
418 mediated alien-native plant interactions.

#### 419 *Flower visitation as a proxy for reproductive success*

420 As flower visitors vary in their pollination effectiveness and can even be antagonists, by  
421 considering only flower visitation, we cannot be completely certain about which visitors are



422 effective pollinators. Charlebois & Sargent (2017) found a significant relationship between  
423 change in flower visitation and change in reproductive success, with a large variability in  
424 reproductive success unexplained by change in visitation. They suggested that although flower  
425 visitation is not the ideal proxy for reproductive success, it is still very useful (Charlebois &  
426 Sargent, 2017). Because seed production and its effect on population growth and invasion should  
427 be most important for short-lived self-incompatible alien plants, the ability to attract pollinators  
428 in the invaded range might be crucial for such species. Our study included both short- and long-  
429 lived species, and self-compatible and self-incompatible species (Table S1), but these life-history  
430 characteristics were not related to flower visitation (Tables S9 and S10). Future experiments  
431 should assess whether the magnitude of pollen limitation of seed production, and subsequent  
432 population dynamics of the alien plants is related to phylogenetic and floral trait distances to co-  
433 flowering natives.

#### 434 **Conclusions**

435 By showing nonlinear effects of phylogenetic and floral trait distances to native species  
436 on flower visitation to alien species, this study advances our understanding of how alien plants  
437 receive pollination services in the invaded range. Multiple mechanisms and processes including  
438 an interplay of pollinator facilitation and competition for pollinators can simultaneously act to  
439 engage the formation of novel pollination interactions. We illustrate the importance of  
440 considering floral traits in plant community ecology studies to understand major ecological  
441 processes such as the formation of novel interactions.

#### 442 **References**

- 443 Aslan, C. E., Sikes, B. A., & Gedan, K. B. (2015). Research on mutualisms between native and  
444 non-native partners can contribute critical ecological insights. *NeoBiota*, 26, 39–54.  
445 <https://doi.org/10.3897/neobiota.26.8837>
- 446 Bates, D., Mächler, M., Bolker, B., & Walker, S. (2014). Fitting linear mixed-effects models  
447 using lme4. *Journal of Statistical Software*, 67(1), 1–48.
- 448 Bergamo, P. J., Streher, N. S., Wolowski, M., & Sazima, M. (2020). Pollinator-mediated  
449 facilitation is associated with floral abundance, trait similarity and enhanced community-  
450 level fitness. *Journal of Ecology*, 108(4), 1334–1346. [https://doi.org/10.1111/1365-](https://doi.org/10.1111/1365-2745.13348)  
451 [2745.13348](https://doi.org/10.1111/1365-2745.13348)



- 452 Bergamo, P. J., Wolowski, M., Maruyama, P. K., Vizentin-Bugoni, J., & Sazima, M. (2018).  
453 Trait patterns across space and time suggest an interplay of facilitation and competition  
454 acting on Neotropical hummingbird-pollinated plant communities. *Oikos*, *127*(11), 1690–  
455 1700. <https://doi.org/10.1111/oik.05571>
- 456 Bezeng, S. B., Davies, J. T., Yessoufou, K., Maurin, O., & Van der Bank, M. (2015). Revisiting  
457 Darwin’s naturalization conundrum: Explaining invasion success of non-native trees and  
458 shrubs in southern Africa. *Journal of Ecology*, *103*(4), 871–879.  
459 <https://doi.org/10.1111/1365-2745.12410>
- 460 Braun, J., & Lortie, C. J. (2019). Finding the bees knees: A conceptual framework and systematic  
461 review of the mechanisms of pollinator-mediated facilitation. *Perspectives in Plant*  
462 *Ecology, Evolution and Systematics*, *36*, 33–40.  
463 <https://doi.org/10.1016/j.ppees.2018.12.003>
- 464 Burns, J. H., Ashman, T.-L., Steets, J. A., Harmon-Threatt, A., & Knight, T. M. (2011). A  
465 phylogenetically controlled analysis of the roles of reproductive traits in plant invasions.  
466 *Oecologia*, *166*(4), 1009–1017. <https://doi.org/10.1007/s00442-011-1929-9>
- 467 Cadotte, M. W., Albert, C. H., & Walker, S. C. (2013). The ecology of differences: Assessing  
468 community assembly with trait and evolutionary distances. *Ecology Letters*, *16*(10),  
469 1234–1244. <https://doi.org/10.1111/ele.12161>
- 470 Cadotte, M. W., Campbell, S. E., Li, S., Sodhi, D. S., & Mandrak, N. E. (2018). Preadaptation  
471 and Naturalization of Nonnative Species: Darwin’s Two Fundamental Insights into  
472 Species Invasion. *Annual Review of Plant Biology*, *69*(1), 661–684.  
473 <https://doi.org/10.1146/annurev-arplant-042817-040339>
- 474 Carvalho, L. G., Biesmeijer, J. C., Benadi, G., Fründ, J., Stang, M., Bartomeus, I., Kaiser-  
475 Bunbury, C. N., Baude, M., Gomes, S. I. F., Merckx, V., Baldock, K. C. R., Bennett, A.  
476 T. D., Boada, R., Bommarco, R., Cartar, R., Chacoff, N., Dänhardt, J., Dicks, L. V.,  
477 Dormann, C. F., ... Kunin, W. E. (2014). The potential for indirect effects between co-  
478 flowering plants via shared pollinators depends on resource abundance, accessibility and  
479 relatedness. *Ecology Letters*, *17*(11), 1389–1399. <https://doi.org/10.1111/ele.12342>
- 480 Charlebois, J. A., & Sargent, R. D. (2017). No consistent pollinator-mediated impacts of alien  
481 plants on natives. *Ecology Letters*, *20*(11), 1479–1490. <https://doi.org/10.1111/ele.12831>
- 482 Darwin, C. (1859). *On the origin of species*. Murray.

- 483 de Jager, M. L., Dreyer, L. L., & Ellis, A. G. (2011). Do pollinators influence the assembly of  
484 flower colours within plant communities? *Oecologia*, *166*(2), 543–553.  
485 <https://doi.org/10.1007/s00442-010-1879-7>
- 486 Diez, J. M., Sullivan, J. J., Hulme, P. E., Edwards, G., & Duncan, R. P. (2008). Darwin’s  
487 naturalization conundrum: Dissecting taxonomic patterns of species invasions. *Ecology*  
488 *Letters*, *11*(7), 674–681. <https://doi.org/10.1111/j.1461-0248.2008.01178.x>
- 489 Durka, W., & Michalski, S. G. (2012). Daphne: A dated phylogeny of a large European flora for  
490 phylogenetically informed ecological analyses. *Ecology*, *93*(10), 2297–2297.  
491 <https://doi.org/10.1890/12-0743.1>
- 492 Eaton, D. A. R., Fenster, C. B., Hereford, J., Huang, S.-Q., & Ree, R. H. (2012). Floral diversity  
493 and community structure in Pedicularis (Orobanchaceae). *Ecology*, *93*(sp8), S182–S194.  
494 <https://doi.org/10.1890/11-0501.1>
- 495 E-Vojtkó, A., de Bello, F., Durka, W., Kühn, I., & Götzenberger, L. (2020). The neglected  
496 importance of floral traits in trait-based plant community assembly. *Journal of Vegetation*  
497 *Science*, *31*(4), 529–539. <https://doi.org/10.1111/jvs.12877>
- 498 Fei, S., Phillips, J., & Shouse, M. (2014). Biogeomorphic Impacts of Invasive Species. *Annual*  
499 *Review of Ecology, Evolution, and Systematics*, *45*(1), 69–87.  
500 <https://doi.org/10.1146/annurev-ecolsys-120213-091928>
- 501 Ferenc, V., & Sheppard, C. S. (2020). The stronger, the better – trait hierarchy is driving alien  
502 species interaction. *Oikos*, *129*(10), 1455–1467. <https://doi.org/10.1111/oik.07338>
- 503 Fornoff, F., Klein, A.-M., Hartig, F., Benadi, G., Venjakob, C., Schaefer, H. M., & Ebeling, A.  
504 (2017). Functional flower traits and their diversity drive pollinator visitation. *Oikos*,  
505 *126*(7), 1020–1030. <https://doi.org/10.1111/oik.03869>
- 506 Gallien, L., & Carboni, M. (2017). The community ecology of invasive species: Where are we  
507 and what’s next? *Ecography*, *40*(2), 335–352. <https://doi.org/10.1111/ecog.02446>
- 508 Gower, J. C. (1971). A General Coefficient of Similarity and Some of Its Properties. *Biometrics*,  
509 *27*(4), 857–871. <https://doi.org/10.2307/2528823>
- 510 Groulx, A. F., & Sargent, R. D. (2018). Purple Loosestrife Provides Long-Distance Pollinator  
511 Attraction to a Coflowering Native Species. *International Journal of Plant Sciences*,  
512 *179*(8), 593–602. <https://doi.org/10.1086/699739>

- 513 Ha, M. K., Schneider, S. A., & Adler, L. S. (2021). Facilitative pollinator sharing decreases with  
514 floral similarity in multiple systems. *Oecologia*, *195*(2), 273–286.  
515 <https://doi.org/10.1007/s00442-020-04770-1>
- 516 Hsu, P.-S., & Yang, E.-C. (2012). The critical cue in pattern discrimination for the honey bee:  
517 Color or form? *Journal of Insect Physiology*, *58*(7), 934–940.  
518 <https://doi.org/10.1016/j.jinsphys.2012.04.009>
- 519 Junker, R. R., Blüthgen, N., & Keller, A. (2015). Functional and phylogenetic diversity of plant  
520 communities differently affect the structure of flower-visitor interactions and reveal  
521 convergences in floral traits. *Evolutionary Ecology*, *29*(3), 437–450.  
522 <https://doi.org/10.1007/s10682-014-9747-2>
- 523 Kraft, N. J., & Ackerly, D. D. (2014). Assembly of plant communities. *Ecology and the*  
524 *Environment*, *8*, 67–88.
- 525 Kühn, I., Durka, W., & Klotz, S. (2004). BioFlor: A New Plant-Trait Database as a Tool for  
526 Plant Invasion Ecology. *Diversity and Distributions*, *10*(5/6), 363–365.
- 527 Kunstler, G., Lavergne, S., Courbaud, B., Thuiller, W., Vieilledent, G., Zimmermann, N. E.,  
528 Kattge, J., & Coomes, D. A. (2012). Competitive interactions between forest trees are  
529 driven by species' trait hierarchy, not phylogenetic or functional similarity: Implications  
530 for forest community assembly. *Ecology Letters*, *15*(8), 831–840.  
531 <https://doi.org/10.1111/j.1461-0248.2012.01803.x>
- 532 Laliberté, E., & Legendre, P. (2010). A distance-based framework for measuring functional  
533 diversity from multiple traits. *Ecology*, *91*(1), 299–305. <https://doi.org/10.1890/08-2244.1>
- 534 Laliberté, E., Legendre, P., & Shipley, B. (2014). *FD: Measuring functional diversity from*  
535 *multiple traits, and other tools for functional ecology. R package version 1.0-12.*
- 536 Lemoine, N. P., Shue, J., Verrico, B., Erickson, D., Kress, W. J., & Parker, J. D. (2015).  
537 Phylogenetic relatedness and leaf functional traits, not introduced status, influence  
538 community assembly. *Ecology*, *96*(10), 2605–2612. <https://doi.org/10.1890/14-1883.1>
- 539 Malecore, E. M., Dawson, W., Kempel, A., Müller, G., & van Kleunen, M. (2019). Nonlinear  
540 effects of phylogenetic distance on early-stage establishment of experimentally introduced  
541 plants in grassland communities. *Journal of Ecology*, *107*(2), 781–793.  
542 <https://doi.org/10.1111/1365-2745.13059>
- 543 Marx, H. E., Giblin, D. E., Dunwiddie, P. W., & Tank, D. C. (2016). Deconstructing Darwin's  
544 Naturalization Conundrum in the San Juan Islands using community phylogenetics and

- 545 functional traits. *Diversity and Distributions*, 22(3), 318–331.  
546 <https://doi.org/10.1111/ddi.12401>
- 547 Masters, J. A., & Emery, S. M. (2015). The showy invasive plant *Ranunculus ficaria* facilitates  
548 pollinator activity, pollen deposition, but not always seed production for two native spring  
549 ephemeral plants. *Biological Invasions*, 17(8), 2329–2337.  
550 <https://doi.org/10.1007/s10530-015-0878-3>
- 551 McGill, B. J., Enquist, B. J., Weiher, E., & Westoby, M. (2006). Rebuilding community ecology  
552 from functional traits. *Trends in Ecology & Evolution*, 21(4), 178–185.  
553 <https://doi.org/10.1016/j.tree.2006.02.002>
- 554 Mitchell, R. J., Flanagan, R. J., Brown, B. J., Waser, N. M., & Karron, J. D. (2009). New  
555 frontiers in competition for pollination. *Annals of Botany*, 103(9), 1403–1413.  
556 <https://doi.org/10.1093/aob/mcp062>
- 557 Molina-Montenegro, M. A., Badano, E. I., & Cavieres, L. A. (2008). Positive interactions among  
558 plant species for pollinator service: Assessing the ‘magnet species’ concept with invasive  
559 species. *Oikos*, 117(12), 1833–1839. <https://doi.org/10.1111/j.0030-1299.2008.16896.x>
- 560 Montero-Castaño, A., & Vilà, M. (2015). Direct and Indirect Influence of Non-Native  
561 Neighbours on Pollination and Fruit Production of a Native Plant. *PLOS ONE*, 10(6),  
562 e0128595. <https://doi.org/10.1371/journal.pone.0128595>
- 563 Morales, C. L., & Traveset, A. (2009). A meta-analysis of impacts of alien vs. Native plants on  
564 pollinator visitation and reproductive success of co-flowering native plants. *Ecology*  
565 *Letters*, 12(7), 716–728. <https://doi.org/10.1111/j.1461-0248.2009.01319.x>
- 566 Nakagawa, S., Johnson, P. C. D., & Schielzeth, H. (2017). The coefficient of determination  $R^2$   
567 and intra-class correlation coefficient from generalized linear mixed-effects models  
568 revisited and expanded. *Journal of The Royal Society Interface*, 14(134), 20170213.  
569 <https://doi.org/10.1098/rsif.2017.0213>
- 570 Orme, D., Freckleton, R., Thomas, G., Petzoldt, T., Fritz, S., Isaac, N., & Pearse, W. (2012).  
571 Caper: Comparative analyses of phylogenetics and evolution in R. *R Package Version 0.5*,  
572 2, 458.
- 573 Ornelas, J. F., Ordano, M., De-Nova, A. J., Quintero, M. E., & Garland Jr, T. (2007).  
574 Phylogenetic analysis of interspecific variation in nectar of hummingbird-visited plants.  
575 *Journal of Evolutionary Biology*, 20(5), 1904–1917. [https://doi.org/10.1111/j.1420-](https://doi.org/10.1111/j.1420-9101.2007.01374.x)  
576 [9101.2007.01374.x](https://doi.org/10.1111/j.1420-9101.2007.01374.x)

- 577 Ortiz, P. L., Fernández-Díaz, P., Pareja, D., Escudero, M., & Arista, M. (2021). Do visual traits  
578 honestly signal floral rewards at community level? *Functional Ecology*, *35*(2), 369–383.  
579 <https://doi.org/10.1111/1365-2435.13709>
- 580 Paradis, E., & Schliep, K. (2019). ape 5.0: An environment for modern phylogenetics and  
581 evolutionary analyses in R. *Bioinformatics*, *35*(3), 526–528.  
582 <https://doi.org/10.1093/bioinformatics/bty633>
- 583 Rausher, M. D. (2008). Evolutionary Transitions in Floral Color. *International Journal of Plant*  
584 *Sciences*, *169*(1), 7–21. <https://doi.org/10.1086/523358>
- 585 Razanajatovo, M., Föhr, C., Fischer, M., Prati, D., & van Kleunen, M. (2015). Non-naturalized  
586 alien plants receive fewer flower visits than naturalized and native plants in a Swiss  
587 botanical garden. *Biological Conservation*, *182*, 109–116.  
588 <https://doi.org/10.1016/j.biocon.2014.11.043>
- 589 Razanajatovo, M., & van Kleunen, M. (2016). Non-invasive naturalized alien plants were not  
590 more pollen-limited than invasive aliens and natives in a common garden. *Functional*  
591 *Ecology*, *30*(9), 1511–1520. <https://doi.org/10.1111/1365-2435.12633>
- 592 R-Core-Team. (2021). *R: A language and environment for statistical computing (R Version 4.0.*  
593 *3, R Foundation for Statistical Computing, Vienna, Austria, 2020).*
- 594 Revell, L. J. (2012). phytools: An R package for phylogenetic comparative biology (and other  
595 things). *Methods in Ecology and Evolution*, *3*(2), 217–223. <https://doi.org/10.1111/j.2041->  
596 [210X.2011.00169.x](https://doi.org/10.1111/j.2041-210X.2011.00169.x)
- 597 Reverté, S., Retana, J., Gómez, J. M., & Bosch, J. (2016). Pollinators show flower colour  
598 preferences but flowers with similar colours do not attract similar pollinators. *Annals of*  
599 *Botany*, *118*(2), 249–257. <https://doi.org/10.1093/aob/mcw103>
- 600 Rezende, E. L., Lavabre, J. E., Guimarães, P. R., Jordano, P., & Bascompte, J. (2007). Non-  
601 random coextinctions in phylogenetically structured mutualistic networks. *Nature*,  
602 *448*(7156), 925–928. <https://doi.org/10.1038/nature05956>
- 603 Rodger, J. G., Bennett, J. M., Razanajatovo, M., Knight, T. M., Kleunen, M. van, Ashman, T.-L.,  
604 Steets, J. A., Hui, C., Arceo-Gómez, G., Burd, M., Burkle, L. A., Burns, J. H., Durka, W.,  
605 Freitas, L., Kemp, J. E., Li, J., Pauw, A., Vamosi, J. C., Wolowski, M., ... Ellis, A. G.  
606 (2021). Widespread vulnerability of flowering plant seed production to pollinator  
607 declines. *Science Advances*, *7*(42). <https://doi.org/10.1126/sciadv.abd3524>

- 608 Sargent, R. D., & Ackerly, D. D. (2008). Plant–pollinator interactions and the assembly of plant  
609 communities. *Trends in Ecology & Evolution*, *23*(3), 123–130.  
610 <https://doi.org/10.1016/j.tree.2007.11.003>
- 611 Shea, K., & Chesson, P. (2002). Community ecology theory as a framework for biological  
612 invasions. *Trends in Ecology & Evolution*, *17*(4), 170–176.  
613 [https://doi.org/10.1016/S0169-5347\(02\)02495-3](https://doi.org/10.1016/S0169-5347(02)02495-3)
- 614 Sheppard, C. S., Carboni, M., Essl, F., Seebens, H., Consortium, D., & Thuiller, W. (2018). It  
615 takes one to know one: Similarity to resident alien species increases establishment success  
616 of new invaders. *Diversity and Distributions*, *24*(5), 680–691.  
617 <https://doi.org/10.1111/ddi.12708>
- 618 Shrestha, M., Dyer, A. G., Bhattarai, P., & Burd, M. (2014). Flower colour and phylogeny along  
619 an altitudinal gradient in the Himalayas of Nepal. *Journal of Ecology*, *102*(1), 126–135.  
620 <https://doi.org/10.1111/1365-2745.12185>
- 621 Stiers, I., Coussement, K., & Triest, L. (2014). The invasive aquatic plant *Ludwigia grandiflora*  
622 affects pollinator visitants to a native plant at high abundances. *Aquatic Invasions*, *9*(3),  
623 357–367. <https://doi.org/10.3391/ai.2014.9.3.10>
- 624 Thuiller, W., Gallien, L., Boulangéat, I., De Bello, F., Münkemüller, T., Roquet, C., & Lavergne,  
625 S. (2010). Resolving Darwin’s naturalization conundrum: A quest for evidence. *Diversity  
626 and Distributions*, *16*(3), 461–475. <https://doi.org/10.1111/j.1472-4642.2010.00645.x>
- 627 Tilman, D. (2004). Niche tradeoffs, neutrality, and community structure: A stochastic theory of  
628 resource competition, invasion, and community assembly. *Proceedings of the National  
629 Academy of Sciences*, *101*(30), 10854–10861. <https://doi.org/10.1073/pnas.0403458101>
- 630 Traveset, A., & Richardson, D. M. (2014). Mutualistic Interactions and Biological Invasions.  
631 *Annual Review of Ecology, Evolution, and Systematics*, *45*(1), 89–113.  
632 <https://doi.org/10.1146/annurev-ecolsys-120213-091857>
- 633 Tur, C., Sáez, A., Traveset, A., & Aizen, M. A. (2016). Evaluating the effects of pollinator-  
634 mediated interactions using pollen transfer networks: Evidence of widespread facilitation  
635 in south Andean plant communities. *Ecology Letters*, *19*(5), 576–586.  
636 <https://doi.org/10.1111/ele.12594>
- 637 Vamosi, J. C., Moray, C. M., Garcha, N. K., Chamberlain, S. A., & Mooers, A. Ø. (2014).  
638 Pollinators visit related plant species across 29 plant–pollinator networks. *Ecology and  
639 Evolution*, *4*(12), 2303–2315. <https://doi.org/10.1002/ece3.1051>

640 Vilà, M., & Hulme, P. E. (Eds.). (2017). *Impact of Biological Invasions on Ecosystem Services*.  
641 Springer International Publishing. <https://doi.org/10.1007/978-3-319-45121-3>

642 Warton, D. I., & Hui, F. K. C. (2011). The arcsine is asinine: The analysis of proportions in  
643 ecology. *Ecology*, 92(1), 3–10. <https://doi.org/10.1890/10-0340.1>

644

645



646 **Figure**

647 **Fig. 1** Effects of phylogenetic and floral trait distances on flower visitation to alien plants and on  
648 similarity in composition of flower visitors to alien and native plants. (a) Effects of phylogenetic  
649 distance on the total number of flower visits to alien plants. (b) Effects of floral trait distance on  
650 the total number of flower visits to alien plants. (c) Effects of phylogenetic distance on the  
651 proportion of flower visits to alien plants. (d) Effects of floral trait distance on the proportion of  
652 flower visits to alien plants. (e) Effects of phylogenetic distance on the similarity in composition  
653 of flower visitors to alien and native plants. (f). Effects of floral trait distance on the similarity in  
654 composition of flower visitors to alien and native plants. Continuous and dashed curves indicate  
655 significant and non-significant effects, respectively. Polygons delimit 95 % confidence intervals.  
656 Insets at the right upper corner of each graph show the raw data.

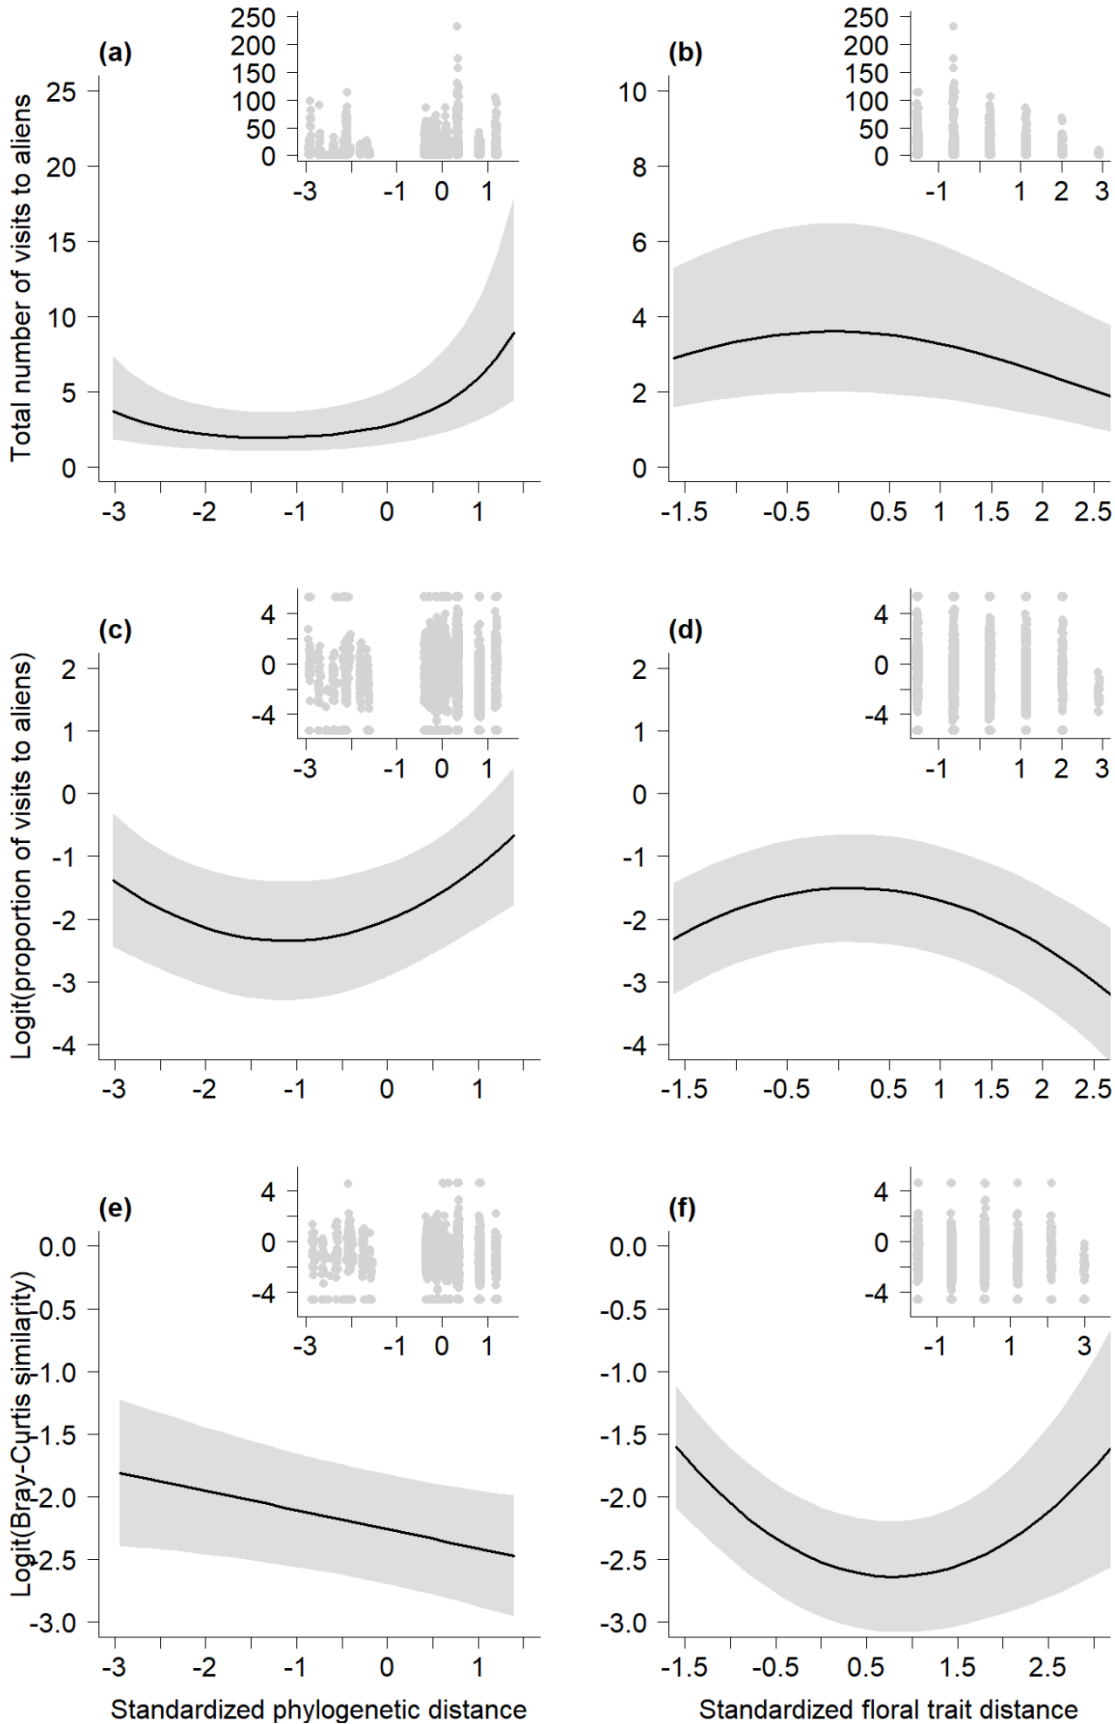

658 **Tables**

659 **Table 1** Results of a negative binomial generalized linear mixed model and a linear mixed model testing how the phylogenetic  
 660 distance between the alien and the native plants influence the total number of flower visits to the alien plant and the proportion of  
 661 flower visits to the alien relative to the total number of flower visits to the alien and the native plants (n=3068).

| Response variables                                                                                                      | Total number of flower visits to the alien plant | Proportion of flower visits to the alien relative to the sum of flower visits to the alien and native plants |
|-------------------------------------------------------------------------------------------------------------------------|--------------------------------------------------|--------------------------------------------------------------------------------------------------------------|
| Fixed terms                                                                                                             | Estimate (Standard error)                        | Estimate (Standard error)                                                                                    |
| Intercept                                                                                                               | <b>1.014 (0.302)</b>                             | <b>-2.018 (0.449)</b>                                                                                        |
| Number of flower units of the native plant                                                                              | <b>-0.133 (0.032)</b>                            |                                                                                                              |
| Number of flower units of the alien plant                                                                               | <b>0.381 (0.045)</b>                             |                                                                                                              |
| Number of flower units of the alien divided by the sum of the number of flower units of the alien and the native plants |                                                  | <b>1.178 (0.073)</b>                                                                                         |
| Flower size of the alien plant                                                                                          | <b>0.482 (0.173)</b>                             | <b>1.016 (0.267)</b>                                                                                         |
| Flower symmetry of the alien plant                                                                                      | 0.145 (0.322)                                    | 0.509 (0.522)                                                                                                |
| Floral reflectance Wavelength 401-470 nm of the alien plant                                                             | -0.554 (0.792)                                   | -0.146 (1.087)                                                                                               |
| Floral reflectance Wavelength 471-540 nm of the alien plant                                                             | 2.172 (1.646)                                    | 4.225 (2.258)                                                                                                |
| Floral reflectance Wavelength 541-610 nm of the alien plant                                                             | <b>2.116 (1.017)</b>                             | <b>2.875 (1.414)</b>                                                                                         |
| Floral reflectance Wavelength 611-680 nm of the alien plant                                                             | 0.787 (0.648)                                    | 0.822 (0.902)                                                                                                |
| Nectar production of the alien plant                                                                                    | 2.220 (1.227)                                    | 1.150 (1.642)                                                                                                |

|                                                                       |                       |                       |
|-----------------------------------------------------------------------|-----------------------|-----------------------|
| Time during the day                                                   | <b>-0.067 (0.023)</b> | <b>-0.101 (0.041)</b> |
| Time during the day squared                                           | <b>-0.059 (0.025)</b> | <b>-0.121 (0.047)</b> |
| Phylogenetic distance between the alien and the native plants         | <b>0.545 (0.097)</b>  | <b>0.593 (0.173)</b>  |
| Phylogenetic distance between the alien and the native plants squared | <b>0.212 (0.046)</b>  | <b>0.266 (0.082)</b>  |
| Random terms                                                          | SD                    | SD                    |
| Alien species                                                         | 1.564                 | 2.136                 |
| Native species                                                        | 0.468                 | 1.002                 |
| Residuals                                                             |                       | 2.220                 |
| AIC                                                                   | 16600.400             | 13829.740             |
| Marginal $r^2$                                                        | 0.263                 | 0.233                 |
| Conditional $r^2$                                                     | 0.832                 | 0.640                 |

662 Significant model parameters are highlighted in bold ( $p < 0.05$ ), and marginally significant model parameters are italicized ( $p < 0.1$ ).

663 **Table 2** Results of a negative binomial generalized linear mixed model and a linear mixed model testing how the floral trait distance  
 664 based on floral traits between the alien and the native plants influence the total number of flower visits to the alien plant and the  
 665 proportion of flower visits to the alien relative to the sum of flower visits to the alien and the native plants (n=3068).

| Response variables                                                                                                      | Total number of flower visits to the alien plant | Proportion of flower visits to the alien relative to the sum of flower visits to the alien and native plants |
|-------------------------------------------------------------------------------------------------------------------------|--------------------------------------------------|--------------------------------------------------------------------------------------------------------------|
| Fixed terms                                                                                                             | Estimate (Standard error)                        | Estimate (Standard error)                                                                                    |
| Intercept                                                                                                               | <b>1.280 (0.295)</b>                             | <b>-1.507 (0.423)</b>                                                                                        |
| Number of flower units of the native plant                                                                              | <b>-0.156 (0.032)</b>                            |                                                                                                              |
| Number of flower units of the alien plant                                                                               | <b>0.369 (0.046)</b>                             |                                                                                                              |
| Number of flower units of the alien divided by the sum of the number of flower units of the alien and the native plants |                                                  | <b>1.330 (0.073)</b>                                                                                         |
| Flower size of the alien plant                                                                                          | <b>0.563 (0.174)</b>                             | <b>0.986 (0.256)</b>                                                                                         |
| Flower symmetry of the alien plant                                                                                      | 0.233 (0.328)                                    | 0.538 (0.513)                                                                                                |
| Floral reflectance Wavelength 401-470 nm of the alien plant                                                             | -0.480 (0.769)                                   | -0.055 (1.015)                                                                                               |
| Floral reflectance Wavelength 471-540 nm of the alien plant                                                             | 1.431 (1.597)                                    | 2.587 (2.133)                                                                                                |
| Floral reflectance Wavelength 541-610 nm of the alien plant                                                             | <i>1.838 (0.992)</i>                             | <b>2.507 (1.333)</b>                                                                                         |
| Floral reflectance Wavelength 611-680 nm of the alien plant                                                             | 0.804 (0.632)                                    | 0.872 (0.847)                                                                                                |
| Nectar production of the alien plant                                                                                    | <b>2.240 (1.191)</b>                             | 1.335 (1.538)                                                                                                |
| Time during the day                                                                                                     | <b>-0.068 (0.023)</b>                            | <b>-0.099 (0.041)</b>                                                                                        |
| Time during the day squared                                                                                             | <b>-0.059 (0.026)</b>                            | <b>-0.122 (0.047)</b>                                                                                        |

|                                                                       |                       |                       |
|-----------------------------------------------------------------------|-----------------------|-----------------------|
| Floral trait distance between the alien and the native plants         | -0.008 (0.036)        | 0.070 (0.065)         |
| Floral trait distance between the alien and the native plants squared | <b>-0.088 (0.025)</b> | <b>-0.266 (0.045)</b> |
| Random terms                                                          | SD                    | SD                    |
| Alien species                                                         | 1.521                 | 1.991                 |
| Native species                                                        | 0.479                 | 1.041                 |
| Residuals                                                             |                       | 2.212                 |
| AIC                                                                   | 16620.000             | 13807.730             |
| Marginal $r^2$                                                        | 0.240                 | 0.226                 |
| Conditional $r^2$                                                     | 0.818                 | 0.619                 |

666 Significant model parameters are highlighted in bold ( $p < 0.05$ ), and marginally significant model parameters are italicized ( $p < 0.1$ ).

667 **Table 3** Strength of the phylogenetic signals for the floral traits of the alien and native species  
668 using Pagel's lambda (continuous trait) and phylogenetic D values (categorical traits).

| Floral traits                            | Phylogenetic signal |
|------------------------------------------|---------------------|
| Flower size                              | 0.956 <sup>a</sup>  |
| Flower symmetry                          | 0.968 <sup>b</sup>  |
| Floral reflectance Wavelength 401-470 nm | 0.041 <sup>b</sup>  |
| Floral reflectance Wavelength 471-540 nm | 0.337 <sup>b</sup>  |
| Floral reflectance Wavelength 541-610 nm | 0.434 <sup>b</sup>  |
| Floral reflectance Wavelength 611-680 nm | 0.013 <sup>b</sup>  |
| Nectar production                        | 0.198 <sup>b</sup>  |

669 <sup>a</sup>A value of 1 indicates that the trait follows a pure Brownian motion model of evolution, <sup>b</sup>the  
670 probabilities of phylogenetic D values resulting from Brownian phylogenetic structure are shown.



671 **Table 4** Results of two linear mixed models testing how the phylogenetic or the floral trait distance based on floral traits between the  
672 alien and the native plants influence the similarity between the flower visitor composition of the alien and the native plants (logit Bray-  
673 Curtis similarity index, n=2017).

|                                                                               | Analysis with phylogenetic distance<br>Estimate (Standard error) | Analysis with floral trait distance<br>Estimate (Standard error) |
|-------------------------------------------------------------------------------|------------------------------------------------------------------|------------------------------------------------------------------|
| Fixed terms                                                                   |                                                                  |                                                                  |
| Intercept                                                                     | <b>-2.258 (0.219)</b>                                            | <b>-2.521 (0.218)</b>                                            |
| Number of flower units of the native plant                                    | <b>-0.114 (0.053)</b>                                            | <b>-0.102 (0.050)</b>                                            |
| Number of flower units of the alien plant                                     | 0.002 (0.065)                                                    | 0.022 (0.058)                                                    |
| Flower size of the alien plant                                                | 0.024 (0.146)                                                    | 0.028 (0.172)                                                    |
| Flower symmetry of the alien plant                                            | -0.161 (0.344)                                                   | 0.016 (0.346)                                                    |
| Floral reflectance Wavelength 401-470 nm of the alien plant                   | 0.242 (0.455)                                                    | 0.007 (0.459)                                                    |
| Floral reflectance Wavelength 471-540 nm of the alien plant                   | -0.222 (1.089)                                                   | -0.770 (1.110)                                                   |
| Floral reflectance Wavelength 541-610 nm of the alien plant                   | <b>1.693 (0.650)</b>                                             | <b>1.499 (0.655)</b>                                             |
| Floral reflectance Wavelength 611-680 nm of the alien plant                   | 0.662 (0.419)                                                    | 0.519 (0.419)                                                    |
| Nectar production of the alien plant                                          | 1.369 (0.820)                                                    | 0.965 (0.826)                                                    |
| Time during the day                                                           | -0.047 (0.039)                                                   | -0.049 (0.040)                                                   |
| Time during the day squared                                                   | -0.033 (0.043)                                                   | -0.030 (0.045)                                                   |
| Phylogenetic or floral trait distance between the alien and the native plants | <b>-0.153 (0.068)</b>                                            | <b>-0.290 (0.059)</b>                                            |

|                                                                                       |          |                      |
|---------------------------------------------------------------------------------------|----------|----------------------|
| Phylogenetic or floral trait distance between the alien and the native plants squared |          | <b>0.180 (0.041)</b> |
| Random terms                                                                          | SD       | SD                   |
| Alien species                                                                         | 0.846    | 0.853                |
| Native species                                                                        | 0.611    | 0.575                |
| Residuals                                                                             | 1.704    | 1.689                |
| AIC                                                                                   | 8039.000 | 8008.542             |
| Marginal $r^2$                                                                        | 0.045    | 0.062                |
| Conditional $r^2$                                                                     | 0.305    | 0.316                |

674 Significant model parameters are highlighted in bold ( $p < 0.05$ ), and marginally significant model parameters are italicized ( $p < 0.1$ ).
